# Supplementary material for: Vibrational frequencies utilized for the assessment of exchange–correlation functionals in the description of metal–adsorbate systems: C2H2 and C2H4 on transition-metal surfaces
Source: Royal Society of Chemistry journal article supplement (doi:10.1039/d4cy00685b), 2024-01-01
Supplement: d4cy00685b1.pdf [file d4cy00685b1.pdf]

## Electronic Supplementary Information

Vibrational frequencies utilized for the assessment of exchange-correlation functionals in the description of metal-adsorbate systems: C<sub>2</sub>H<sub>2</sub> and C<sub>2</sub>H<sub>4</sub> on transition-metal surfaces

Ray Miyazaki,<sup>\*,†,‡,§</sup> Somayeh Faraji,<sup>†,§</sup> Sergey V. Levchenko,<sup>¶</sup> Lucas Foppa,<sup>\*,†</sup> and

Matthias Scheffler<sup>†</sup>

<sup>†</sup>*The NOMAD Laboratory at the Fritz-Haber-Institute of the Max-Planck-Gesellschaft and IRIS-Adlershof of the Humboldt-Universität zu Berlin, Faradayweg 4-6, D-14195 Berlin, Germany*

<sup>‡</sup>*Institute for Catalysis, Hokkaido University, N21 W10 Kita-ku, Sapporo, Hokkaido, 001-0021, Japan*

<sup>¶</sup>*Center for Energy Science and Technology, Skolkovo Institute of Science and Technology, Moscow 121205, Russia*

<sup>§</sup>*These authors contributed equally*

E-mail: ray\_miyazaki@cat.hokudai.ac.jp; foppa@fhi-berlin.mpg.de

## S1. Geometry analysis of C<sub>2</sub>H<sub>2</sub> and C<sub>2</sub>H<sub>4</sub>

Geometry optimizations for the molecules in the gas phase are performed. The obtained geometrical parameters are listed in Table S1 along with the corresponding experimental values.

Table S1: Calculated and experimental geometrical parameters (bond lengths  $d$  and angles  $\angle$  in Å and degree, respectively) for the C<sub>2</sub>H<sub>2</sub> and C<sub>2</sub>H<sub>4</sub> molecules in the gas phase.

|                                 |        |        |                     |
|---------------------------------|--------|--------|---------------------|
| C <sub>2</sub> H <sub>2</sub>   | mBEEF  | RPBE   | Exp. <sup>[1]</sup> |
| $d_{\text{CH}}$ (Å)             | 1.059  | 1.070  | 1.061               |
| $d_{\text{CC}}$ (Å)             | 1.194  | 1.210  | 1.203               |
| C <sub>2</sub> H <sub>4</sub>   | mBEEF  | RPBE   | Exp. <sup>[2]</sup> |
| $d_{\text{CC}}$ (Å)             | 1.322  | 1.337  | 1.337±0.003         |
| $d_{\text{CH}}$ (Å)             | 1.081  | 1.092  | 1.086±0.003         |
| $\angle$ (HCC)                  | 121.78 | 121.75 | 121.35±1            |
| $\angle$ (HCH)                  | 116.4  | 116.5  |                     |
| $\angle$ ((CH <sub>2</sub> )-C) | 179.97 | 179.94 | 180.00              |

## S2. Bulk lattice constants

Table S2: Bulk lattice constant  $a$  (in Å) of each material in its stable crystal phase (FCC structure with space group  $Fm\bar{3}m$ ) obtained by mBEEF and RPBE XC functionals. A  $k$ -point mesh of  $20 \times 20 \times 20$  was used for each calculation. The values in parentheses next to the mBEEF and RPBE values indicate the deviation from experimental results. Last row shows the mean absolute percentage error (MAPE) of each functional. mBEEF(QHA) and RPBE(QHA) are the results incorporating thermal effects via the quasi-harmonic approximation (QHA) at the experimental temperature at which the lattice constants were measured. The QHA was evaluated using the phonon analysis as implemented in Phonopy.<sup>28</sup>

| compound    | mBEEF          | mBEEF (QHA)    | RPBE          | RPBE (QHA)    | Exp.                              |
|-------------|----------------|----------------|---------------|---------------|-----------------------------------|
| Pd          | 3.887 (-0.004) | 3.904 (0.013)  | 3.977 (0.086) | 3.993 (0.102) | 3.891<br>(295.15 K) <sup>3</sup>  |
| Pt          | 3.916 (-0.008) | 3.902 (-0.022) | 3.939 (0.015) | 4.006 (0.082) | 3.924<br>(298.15 K) <sup>27</sup> |
| Rh          | 3.769 (-0.035) | 3.781 (-0.023) | 3.851 (0.047) | 3.862 (0.058) | 3.804<br>(294.65 K) <sup>3</sup>  |
| Cu          | 3.575 (-0.040) | 3.588 (-0.027) | 3.674 (0.059) | 3.691 (0.076) | 3.615<br>(291.15 K) <sup>3</sup>  |
| MAPE (in %) | 0.589          | 0.562          | 1.342         | 2.085         | -                                 |

### S3. Vibrational modes

Figure S1 illustrates different vibrational modes of acetylene and ethylene in gas phase. Arrows in orange are showing the movement direction. Dot and cross marks inside the orange circles are used to show the movement direction. Here, we briefly describe the movements of atoms in each type of the vibrational modes. As shown in the figure, "twisting" modes are related to a change in the angle between planes containing groups of atoms. "Rocking" modes represent a change in the angle between the group of H-C-H atoms (shown in pink) and the rest of the molecule. A change in the angle between the plane of a group of H-C-H atoms (shown in pink) and a plane through the rest of the molecule refers to "wagging" modes. Rocking is distinguished from wagging by the fact that the atoms in the group stay in the same plane as the rest of the ethylene molecule. The in-plane and out-of-plane bending modes are denoted by  $\delta$  and  $\gamma$ , respectively. In a rocking, wagging or twisting coordinate the bond lengths within the atomic groups involved slightly change. So the dominant movements are in the angles.

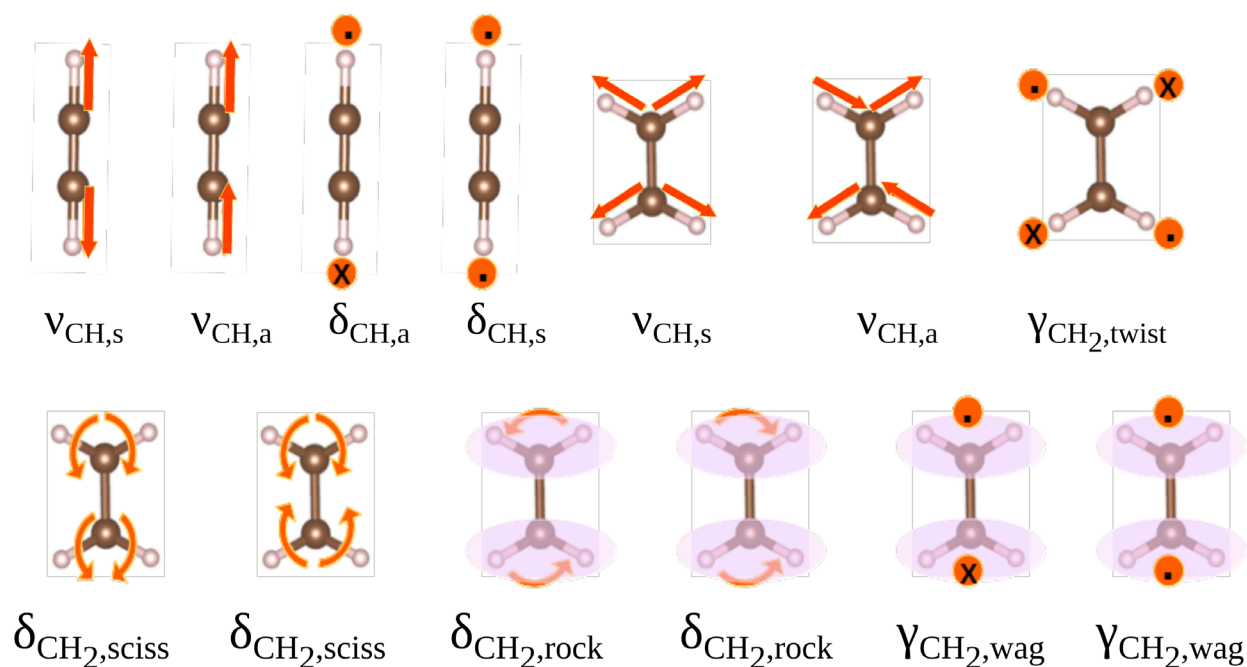

Figure S1: Vibrational modes of acetylene and ethylene in gas phase.  $\nu$ ,  $\delta$  and  $\gamma$  denote stretch mode, in-plane bending mode and out-of-plane bending mode, respectively. "a" and "s" represent asymmetric and symmetric stretches, respectively. Dot and cross marks inside the orange circles denote the out-of-plane movement direction of an atom or group of atoms.

## S4. Vibrational frequencies of $\text{C}_2\text{H}_2$ and $\text{C}_2\text{H}_4$ in the gas phase

The calculated vibrational frequencies of  $\text{C}_2\text{H}_2$  and  $\text{C}_2\text{H}_4$  in the gas phase and the corresponding experimental values are summarized in Table S3 (detailed description of each vibrational mode is provided in the previous section and shown in FIG. S1).  $\text{C}_2\text{H}_2$  is a symmetric linear molecule with  $3N - 5 = 7$  normal modes. However, only five modes are reported in the table because the bending modes come in degenerate pairs, i.e., there are two equivalent modes with the same frequency. According to the calculated data shown in the table, the vibrational frequencies obtained by the mBEEF functional are overestimated while the RPBE functional underestimates them: the mean percentage error ( $\text{MPE} = \frac{100}{16} \sum_{i=1}^{16} \frac{\text{DFA}_i - \text{Exp}_i}{\text{Exp}_i}$ ) of all the considered vibrational modes summarized in Table S3 obtained by mBEEF and RPBE are 3.04% and -0.13%, respectively.

To simplify the comparison, the frequency differences of each vibrational mode of the  $C_2H_2$  and  $C_2H_4$  molecules (in gas phase) with respect to the experimental values are shown in the FIG. S2. Our analysis shows that the root mean square error (RMSE) of the vibrational frequencies obtained with RPBE is smaller than for mBEEF by  $79\text{ cm}^{-1}$  for  $C_2H_2$  and  $58\text{ cm}^{-1}$  for  $C_2H_4$ .

Another notable result in the FIG. S2 is the larger deviation of the mBEEF results for the stretching modes while the bending modes (rocking, wagging, and scissoring) display smaller deviations. From comparison of calculated vibrational frequencies of stretching modes with experiment it can be inferred that mBEEF overestimates the strength of the bonds. However, the electrostatic interactions and orbital hybridization determining the bending force constants are less affected by the approximations in the XC functional, which results in smaller frequency deviations for bending-type vibrational modes.

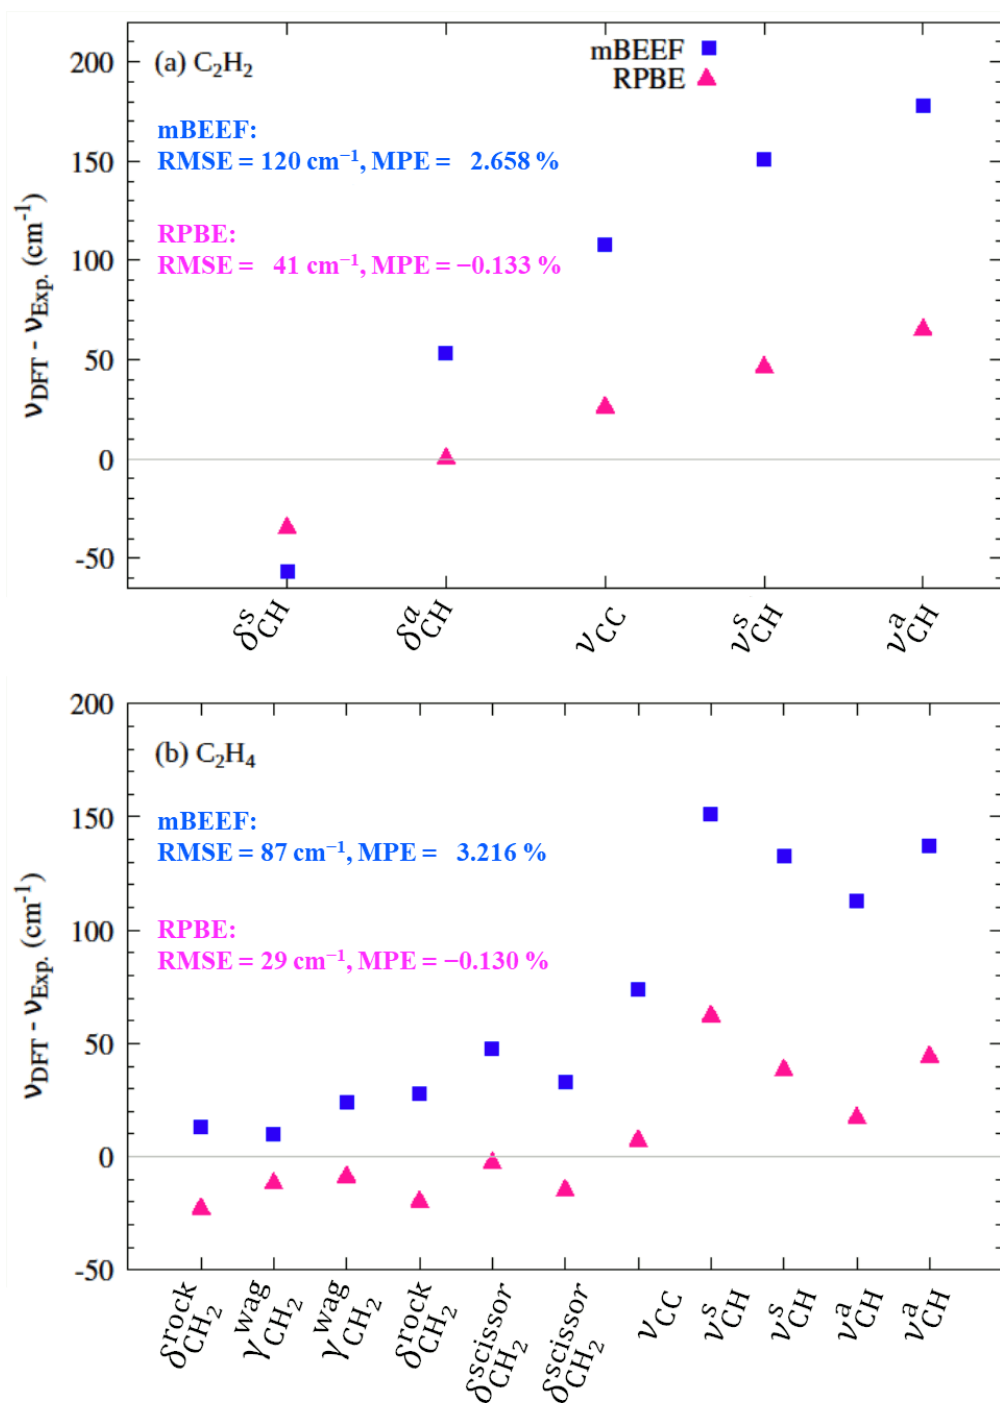

Figure S2: Deviations of calculated vibrational frequencies of C<sub>2</sub>H<sub>2</sub> and C<sub>2</sub>H<sub>4</sub> molecules in gas phase from experimental values. The blue squares and pink triangles indicate the deviations for mBEEF and RPBE functionals, respectively. (See Table S3 for the values of vibrational frequencies and experimental references.) RMSE and MPE denote root mean squared error and mean percentage error, respectively.

Table S3: The vibrational frequencies (in  $\text{cm}^{-1}$ ) of the  $\text{C}_2\text{H}_2$  and  $\text{C}_2\text{H}_4$  molecules in the gas phase.  $\nu$ ,  $\delta$  and  $\gamma$  denote stretch mode, in-plane bending mode and out-of-plane bending mode, respectively. "a" and "s" denote asymmetric and symmetric modes, respectively. RMSE and MPE denote the values of root mean squared error and mean percentage error, respectively.

| $\text{C}_2\text{H}_2$                  | mBEEF | RPBE   | Exp. <sup>4</sup> |
|-----------------------------------------|-------|--------|-------------------|
| $\delta^s_{\text{CH}}$                  | 555   | 578    | 612               |
| $\delta^a_{\text{CH}}$                  | 782   | 730    | 729               |
| $\nu_{\text{CC}}$                       | 2082  | 2001   | 1974              |
| $\nu^s_{\text{CH}}$                     | 3446  | 3342   | 3295              |
| $\nu^a_{\text{CH}}$                     | 3551  | 3439   | 3373              |
| RMSE ( $\text{cm}^{-1}$ )               | 120   | 41     |                   |
| MPE (%)                                 | 2.658 | -0.133 |                   |
| $\text{C}_2\text{H}_4$                  | mBEEF | RPBE   | Exp. <sup>5</sup> |
| $\delta^{\text{rock}}_{\text{CH}_2}$    | 839   | 804    | 826               |
| $\gamma^{\text{wag}}_{\text{CH}_2}$     | 950   | 929    | 940               |
| $\gamma^{\text{wag}}_{\text{CH}_2}$     | 973   | 941    | 949               |
| $\gamma^{\text{twist}}_{\text{CH}_2}$   | 1080  | 1032   | -                 |
| $\delta^{\text{rock}}_{\text{CH}_2}$    | 1250  | 1203   | 1222              |
| $\delta^{\text{scissor}}_{\text{CH}_2}$ | 1390  | 1340   | 1342              |
| $\delta^{\text{scissor}}_{\text{CH}_2}$ | 1477  | 1430   | 1444              |
| $\nu_{\text{CC}}$                       | 1697  | 1631   | 1623              |
| $\nu^s_{\text{CH}}$                     | 3140  | 3052   | 2989              |
| $\nu^s_{\text{CH}}$                     | 3159  | 3065   | 3026              |
| $\nu^a_{\text{CH}}$                     | 3216  | 3121   | 3103              |
| $\nu^a_{\text{CH}}$                     | 3242  | 3150   | 3105              |
| RMSE ( $\text{cm}^{-1}$ )               | 87    | 29     |                   |
| MPE (%)                                 | 3.216 | -0.130 |                   |

## S5. Vibrational frequencies of adsorbed $\text{C}_2\text{H}_2$ and $\text{C}_2\text{H}_4$

Table S4 summarizes the chamber exposures and the reported coverage for the adsorbed species.

The vibrational frequencies of adsorbed  $\text{C}_2\text{H}_2$  and  $\text{C}_2\text{H}_4$  on FCC(111) surfaces of Pt, Pd, Rh, and Cu are summarized in Table S5.

Table S4: Experimental/theoretical data on the coverage ( $\theta$  in ML) and gas exposure ( $P$  in L, 1L= 1 langmuir =  $1 \times 10^{-6}$  Torr-second) for the adsorbed systems.

| system                                               | $P$ | $\theta$ |
|------------------------------------------------------|-----|----------|
| C <sub>2</sub> H <sub>2</sub> /Pd(111) <sup>6</sup>  | 3   | 1/3      |
| C <sub>2</sub> H <sub>2</sub> /Pd(111) <sup>7</sup>  | 1.5 | 1/3      |
| C <sub>2</sub> H <sub>2</sub> /Rh(111) <sup>8</sup>  | 0.5 | 1/4      |
| C <sub>2</sub> H <sub>2</sub> /Cu(111) <sup>9</sup>  | 2.3 |          |
| C <sub>2</sub> H <sub>2</sub> /Pt(111) <sup>10</sup> | 2   |          |
| C <sub>2</sub> H <sub>4</sub> /Cu(111) <sup>11</sup> | 100 | 1/3      |
| C <sub>2</sub> H <sub>4</sub> /Pd(111) <sup>12</sup> | 30  |          |

Table S5: Calculated and experimental vibrational frequencies (in cm<sup>-1</sup>) for C<sub>2</sub>H<sub>2</sub> and C<sub>2</sub>H<sub>4</sub> adsorbed on different TMSs at the coverage of 1/9 ML and 1/4 ML. The values for 1/4 ML are shown in parentheses. Stretch modes are labeled by  $\nu$ , while  $\delta$  and  $\gamma$  denote in-plane and out-of-plane bending modes, respectively.

| mode                          | method | Pt(111)            | Pd(111)                              | Rh(111)           | Cu(111)                               |
|-------------------------------|--------|--------------------|--------------------------------------|-------------------|---------------------------------------|
| C <sub>2</sub> H <sub>2</sub> |        | (fcc-par)          | (fcc-par)                            | (fcc-par)         | (b-per)                               |
| $\nu_{\text{CH,s}}$           | Exp.   | 3010 <sup>10</sup> | 2990, <sup>6</sup> 2992 <sup>7</sup> | 2960 <sup>8</sup> | 2920, <sup>9</sup> 2913 <sup>13</sup> |
|                               | mBEEF  | 3164(3146)         | 3145(3132)                           | 3121(3190)        | 3090(3069 )                           |
|                               | RPBE   | 3078(3065)         | 3064(3057)                           | 3043(3036)        | 3003(2992)                            |
| $\nu_{\text{CC}}$             | Exp.   | 1310 <sup>10</sup> | 1400, <sup>6</sup> 1402 <sup>7</sup> | 1260 <sup>8</sup> | 1307, <sup>9</sup> 1294 <sup>13</sup> |
|                               | mBEEF  | 1324(1335)         | 1353(1365)                           | 1295(1298)        | 1325(1352 )                           |
|                               | RPBE   | 1262(1273)         | 1303(1316)                           | 1238(1241)        | 1261(1291)                            |
| $\delta_{\text{CH,a}}$        | Exp.   | 985 <sup>10</sup>  | 1034 <sup>7</sup>                    | 1120 <sup>8</sup> | 920, <sup>9</sup> 920 <sup>13</sup>   |
|                               | mBEEF  | 1170(1170)         | 1090(1087)                           | 1132(1127)        | 1152(1144 )                           |
|                               | RPBE   | 1119(1119)         | 1033(1030)                           | 1078(1073)        | 1105(1100)                            |
| $\delta_{\text{CH,s}}$        | Exp.   | —                  | 872 <sup>7</sup>                     | 950 <sup>8</sup>  | —                                     |
|                               | mBEEF  | 1017(1024)         | 929(946)                             | 967(985)          | 964(973 )                             |
|                               | RPBE   | 976 (985)          | 885(900)                             | 924(941)          | 925(935)                              |
| $\gamma_{\text{CH,a}}$        | Exp.   | —                  | 880 <sup>6</sup>                     | —                 | —                                     |

*Continued on next page*



Table S5 – *Continued from previous page*

|                                           |       | Pt(111)              | Pd(111)                                    |                    |                    |
|-------------------------------------------|-------|----------------------|--------------------------------------------|--------------------|--------------------|
| C <sub>2</sub> H <sub>4</sub>             |       | (b-par)              | (b-par)                                    |                    |                    |
|                                           | mBEEF | 872(869)             | 795(792)                                   | 833(825)           | 914(915)           |
|                                           | RPBE  | 837(831)             | 766(761)                                   | 802(793)           | 882(887)           |
| $\gamma_{\text{CH}_s}$                    | Exp.  | 770 <sup>[10]</sup>  | 660, <sup>[6]</sup> 673 <sup>[7]</sup>     | 720 <sup>[8]</sup> | 680 <sup>[9]</sup> |
|                                           | mBEEF | 796(794)             | 710(706)                                   | 733(726)           | 690(671)           |
|                                           | RPBE  | 759(752)             | 678(672)                                   | 704(695)           | 659(644)           |
| $\nu_{\text{MC},s}$                       | Exp.  | 570 <sup>[10]</sup>  | 500 <sup>[7]</sup>                         | —                  | 420 <sup>[9]</sup> |
|                                           | mBEEF | 579(593)             | 532(539)                                   | 562(558)           | 428(435)           |
|                                           | RPBE  | 546(557)             | 482(489)                                   | 515(513)           | 394(401)           |
| $\nu_{\text{CH}_2}^a$                     | Exp.  | 3000 <sup>[14]</sup> | —                                          |                    |                    |
|                                           | mBEEF | 3133(3111)           | 3129(3112)                                 |                    |                    |
|                                           | RPBE  | 3051(3041)           | 3060(3052)                                 |                    |                    |
| $\nu_{\text{CH}}^s$                       | Exp.  | 2940 <sup>[10]</sup> | 2900, <sup>[12]</sup> 2928 <sup>[11]</sup> |                    |                    |
|                                           | mBEEF | 3077(3062)           | 3066(3055)                                 |                    |                    |
|                                           | RPBE  | 2992(2989)           | 2993(2989)                                 |                    |                    |
| $\nu_{\text{CH}_2}^s$                     | Exp.  | 2920 <sup>[14]</sup> | —                                          |                    |                    |
|                                           | mBEEF | 3065(3048)           | 3054(3040)                                 |                    |                    |
|                                           | RPBE  | 2985(2977)           | 2985(2978)                                 |                    |                    |
| $\delta_{\text{CH}_2}^{\text{scissor},s}$ | Exp.  | 1430 <sup>[14]</sup> | 1428 <sup>[11]</sup>                       |                    |                    |
|                                           | mBEEF | 1470(1471)           | 1478(1478)                                 |                    |                    |
|                                           | RPBE  | 1422(1423)           | 1433(1433)                                 |                    |                    |
| $\nu_{\text{CC}}$                         | Exp.  | 1050 <sup>[14]</sup> | 1103, <sup>[12]</sup> 1097 <sup>[11]</sup> |                    |                    |
|                                           | mBEEF | 1023(1022)           | 1102(1095)                                 |                    |                    |
|                                           | RPBE  | 980(983)             | 1087(1081)                                 |                    |                    |

*Continued on next page*

Table S5 – *Continued from previous page*

|                                         |       | Pt(111)                 | Pd(111)             |
|-----------------------------------------|-------|-------------------------|---------------------|
| C <sub>2</sub> H <sub>4</sub>           |       | (b-par)                 | (b-par)             |
| $\gamma_{\text{CH}_2}^{\text{wag,s}}$   | Exp.  | 980 <sup>[14]</sup>     | 871 <sup>[11]</sup> |
|                                         | mBEEF | 976(980)                | 910(913)            |
|                                         | RPBE  | 932(937)                | 862(869)            |
| $\gamma_{\text{CH}_2}^{\text{twist,s}}$ | Exp.  | 790 <sup>[14]</sup>     | —                   |
|                                         | mBEEF | 819(811)                | 796(782)            |
|                                         | RPBE  | 790(781)                | 786(770)            |
| $\delta_{\text{CH}_2}^{\text{rock,s}}$  | Exp.  | 660 <sup>[14]</sup>     | —                   |
|                                         | mBEEF | 683(678)                | 603(594)            |
|                                         | RPBE  | 649(644)                | 552(545)            |
| $\nu_{\text{MC}}^{\text{a}}$            | Exp.  | 560 <sup>[14]</sup>     | —                   |
|                                         | mBEEF | 587(591)                | 512(515)            |
|                                         | RPBE  | 546(549)                | 447(453)            |
| $\nu_{\text{MC}}^{\text{s}}$            | Exp.  | 470 <sup>[10][14]</sup> | —                   |
|                                         | mBEEF | 493(499)                | 437(443)            |
|                                         | RPBE  | 450(454)                | 359(370)            |

<sup>[6]</sup> T=130 K, 3L C<sub>2</sub>H<sub>2</sub>, ( $\sqrt{3} \times \sqrt{3}$ )R30, <sup>[6]</sup> T=130 K, 3L C<sub>2</sub>H<sub>2</sub>, ( $\sqrt{3} \times \sqrt{3}$ )R30,

<sup>[8]</sup> 77K, 0.5L C<sub>2</sub>H<sub>2</sub>, 0.25ML, <sup>[10]</sup> C<sub>2</sub>H<sub>2</sub>/Pt(111) at 150-300 K and C<sub>2</sub>H<sub>4</sub>/Pt(111) at 140-260 K,

<sup>[7]</sup> T=150 K, 1.5L C<sub>2</sub>H<sub>2</sub>, ( $\sqrt{3} \times \sqrt{3}$ )R30, <sup>[9]</sup> 110-120 K,

<sup>[13]</sup> 250 K, <sup>[14]</sup> pressure < 10<sup>-9</sup> Pa, T=92K,

<sup>[12]</sup> 80K, <sup>[11]</sup> < 10<sup>-10</sup> mbar, 100K

## S6. Adsorption energies of C<sub>2</sub>H<sub>2</sub> and C<sub>2</sub>H<sub>4</sub> on Pd(111)

The adsorption energies of C<sub>2</sub>H<sub>2</sub> and C<sub>2</sub>H<sub>4</sub> on Pd(111) are summarised in Table S6.

Table S6: The comparison of our calculated (mBEEF and RPBE)  $E_{ads}$  (in eV) with available experimental and theoretical data reported in the literature. ( $\theta$  is the coverage in ML)

| system                                 | site  | $\theta$ (ML) | mBEEF   | RPBE  | Exp. | Others.                                             |
|----------------------------------------|-------|---------------|---------|-------|------|-----------------------------------------------------|
| C <sub>2</sub> H <sub>2</sub> /Pd(111) | h-fcc | 1/4           | -2.31   | -1.64 |      | $\approx -1.38$ <sup>[15]</sup> (RPBE)              |
|                                        |       | 1/4           |         |       |      | -2.25, <sup>[16]</sup> -2.03, <sup>[17]</sup>       |
|                                        |       | 1/4           |         |       |      | -1.91, <sup>[18]</sup> -1.78 <sup>[19]</sup> (PW91) |
|                                        | b-par | 1/4           | -1.77   | -1.16 |      | -1.86, <sup>[16]</sup> -1.12 <sup>[18]</sup> (PW91) |
|                                        | top   | 1/4           | changed | -0.40 |      | -0.91, <sup>[16]</sup> -0.63 <sup>[18]</sup> (PW91) |
| C <sub>2</sub> H <sub>4</sub> /Pd(111) | b-par | 1/4           | -0.99   | -0.40 |      | $\approx -0.38$ <sup>[15]</sup> (RPBE)              |
|                                        |       | 1/4           |         |       |      | -0.23 <sup>[20]</sup> (Tight-Binding)               |
|                                        |       | 1/4           |         |       |      | -0.86 <sup>[21]</sup> (PW91)                        |

## S7. Comparison with other XC functionals and effect of van-der-Waals (vdW) corrections

To demonstrate further applications of our approach and the influence of vdW corrections, we calculated vibrational frequencies and adsorption enthalpy of C<sub>2</sub>H<sub>4</sub> on the Pt(111) surface with TPSS<sup>22</sup>, PBEsol<sup>23</sup>, and RPBE with the Tkatchenko-Scheffler vdW correction<sup>24</sup> (RPBE+TS). TPSS is reported as the reliable functional for the bulk and surface properties of metals<sup>25</sup>, and PBEsol is also widely used functional for solid systems. As shown in Figure S3a and Table S7, PBEsol gives the lowest RMSE for the vibrational frequency. TPSS shows a moderate performance among the adopted XC functionals, and there is not significant effect of the vdW correction on the accuracy of the vibrational frequency in RPBE+TS. On the other hand, as shown in Figure S3b, RPBE+TS overestimates the adsorption enthalpy compared to RPBE by 0.42 eV. Additionally, PBEsol shows the worst error among the considered functionals while the performance of TPSS is moderate.

We also investigated reaction enthalpy of the semi-hydrogenation of C<sub>2</sub>H<sub>2</sub> to C<sub>2</sub>H<sub>4</sub> in the gas phase. The calculated reaction enthalpy  $H_r(DFA)$  is the difference of the enthalpy of each molecule in the gas phase.

$$H_r(DFA) = H_{C_2H_4} - (H_{C_2H_2} + H_{H_2})$$

$H_r(DFA)$  was compared with experimental reaction enthalpy  $H_r(Exp.)$  derived from the standard enthalpy of formation.<sup>26</sup>

$$H_r(Exp.) = \Delta_f H_{C_2H_4}^0 - \Delta_f H_{C_2H_2}^0$$

As shown in Figure S3c, RPBE showed the best performance. TPSS also showed a good performance, but mBEEF and PBEsol are not so accurate. This trend is also fit to the accuracy trend on the adsorption enthalpy.

By considering the result shown in Figure S3, RPBE is the most reliable functional for the target system because of its high accuracy for the investigated properties. On the other hand, PBEsol showed a good accuracy for the vibrational frequency, but its accuracy for the adsorption and reaction enthalpy is lower than the other functionals. These results suggest that, ideally, the assessment of the XC functionals should be based on multiple aspects. However, in practice, we are bound to use limited available measured quantities, such as vibrational frequencies, for benchmarking the calculation methods to describe metal-adsorbate systems.

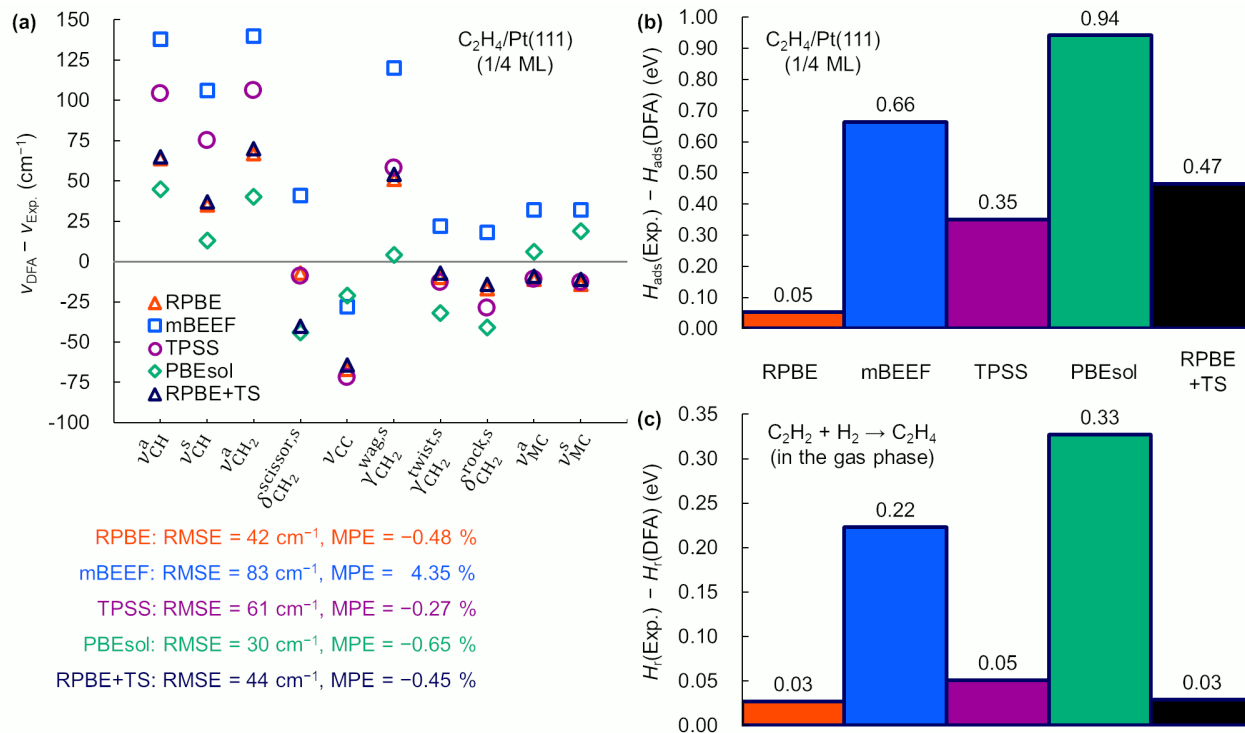

Figure S3: Investigation with other XC functionals and vdW correction. Accuracy for (a) vibrational frequencies and (b) adsorption enthalpy of the  $\text{C}_2\text{H}_4/\text{Pt}(111)$  system. Note that only vibrations of the adsorbate and its nearest-neighbor Pt atoms are considered for calculating the vibrational frequencies in these investigations. (c) Assessment for the reaction enthalpy of the semi-hydrogenation of  $\text{C}_2\text{H}_2$  to  $\text{C}_2\text{H}_4$  in the gas phase.

Table S7: Summary of the vibrational frequencies of the  $\text{C}_2\text{H}_4/\text{Pt}(111)$  system with other XC functionals. Note that only vibrations of the adsorbate and its nearest-neighbor Pt atoms are considered for calculating the vibrational frequencies in this investigation.

|                       | $\nu^{\text{a}}_{\text{CH}}$ | $\nu^{\text{s}}_{\text{CH}}$ | $\nu^{\text{s}}_{\text{CH}_2}$ | $\delta^{\text{scissor,s}}_{\text{CH}_2}$ | $\nu_{\text{CC}}$ | $\gamma^{\text{wag,s}}_{\text{CH}_2}$ | $\gamma^{\text{twist,s}}_{\text{CH}_2}$ | $\delta^{\text{rock,s}}_{\text{CH}_2}$ | $\nu^{\text{a}}_{\text{MC}}$ | $\nu^{\text{s}}_{\text{MC}}$ | RMSE (cm $^{-1}$ ) | MPE (%) |
|-----------------------|------------------------------|------------------------------|--------------------------------|-------------------------------------------|-------------------|---------------------------------------|-----------------------------------------|----------------------------------------|------------------------------|------------------------------|--------------------|---------|
| Exp. <sup>10,14</sup> | 3000                         | 2940                         | 2920                           | 1430                                      | 1050              | 980                                   | 790                                     | 660                                    | 560                          | 470                          | -                  | -       |
| RPBE                  | 3064                         | 2975                         | 2987                           | 1423                                      | 983               | 1031                                  | 780                                     | 643                                    | 549                          | 456                          | 42                 | -0.48   |
| mBEEF                 | 3138                         | 3046                         | 3060                           | 1471                                      | 1022              | 1100                                  | 812                                     | 678                                    | 592                          | 502                          | 83                 | 4.35    |
| TPSS                  | 3104                         | 3015                         | 3026                           | 1421                                      | 978               | 1038                                  | 777                                     | 631                                    | 549                          | 457                          | 61                 | -0.27   |
| PBEsol                | 3045                         | 2953                         | 2960                           | 1386                                      | 1029              | 984                                   | 758                                     | 619                                    | 566                          | 489                          | 30                 | -0.65   |
| RPBE+TS               | 3065                         | 2977                         | 2990                           | 1390                                      | 986               | 1034                                  | 783                                     | 646                                    | 551                          | 459                          | 44                 | -0.45   |

## References

- (1) Harmony, M. D.; Laurie, V. W.; Kuczkowski, R. L.; Schwendeman, R.; Ramsay, D.; Lovas, F. J.; Lafferty, W. J.; Maki, A. G. Molecular structures of gas-phase polyatomic molecules determined by spectroscopic methods. *Journal of Physical and Chemical Reference Data* 1979, 8, 619–722.
- (2) Allen Jr, H. C.; Plyler, E. K. The Structure of Ethylene from Infrared Spectra<sup>1</sup>. *Journal of the American Chemical Society* 1958, 80, 2673–2676.
- (3) Eckerlin, P.; Hellwege, K.-H.; Kandler, H.; Hellwege, A. *Structure data of elements and intermetallic phases*; Springer, 1971; Vol. 6.
- (4) Herzberg, G. *Electronic spectra and electronic structure of polyatomic molecules*; van Nostrand, 1966; Vol. 3.
- (5) Van Lerberghe, D.; Wright, I.; Duncan, J. High-resolution infrared spectrum and rotational constants of ethylene-H<sub>4</sub>. *Journal of Molecular Spectroscopy* 1972, 42, 251–273.
- (6) Timbrell, P.; Gellman, A.; Lambert, R.; Willis, R. Negative ion resonance selective mode enhancement in the hreel spectrum of C<sub>2</sub>H<sub>2</sub> on Pd (111). *Surface Science* 1988, 206, 339–347.
- (7) Gates, J.; Kesmodel, L. Thermal evolution of acetylene and ethylene on Pd (111). *Surface Science* 1983, 124, 68–86.
- (8) Mate, C.; Kao, C.-T.; Bent, B.; Somorjai, G. The surface structure and thermal decomposition of acetylene on the Rh (111) single crystal surface and the effect of coadsorbed carbon monoxide. *Surface science* 1988, 197, 183–207.

- (9) Bandy, B.; Chesters, M.; Pemble, M.; McDougall, G.; Sheppard, N. Low temperature electron energy loss spectra of acetylene chemisorbed on metal single-crystal surfaces; Cu(111), Ni(110) and Pd(110). *Surface Science* 1984, *139*, 87–97.
- (10) Ibach, H.; Lehwald, S. Identification of surface radicals by vibration spectroscopy: Reactions of C<sub>2</sub>H<sub>2</sub>, C<sub>2</sub>H<sub>4</sub>, and H<sub>2</sub> on Pt (111). *Journal of Vacuum Science and Technology* 1978, *15*, 407–415.
- (11) Sock, M.; Eichler, A.; Surnev, S.; Andersen, J. N.; Klötzer, B.; Hayek, K.; Ramsey, M.; Netzer, F. High-resolution electron spectroscopy of different adsorption states of ethylene on Pd (1 1 1). *Surface science* 2003, *545*, 122–136.
- (12) Stacchiola, D.; Calaza, F.; Zheng, T.; Tysøe, W. T. Hydrocarbon conversion on palladium catalysts. *Journal of Molecular Catalysis A: Chemical* 2005, *228*, 35–45.
- (13) Chesters, M.; McCash, E. A fourier-transform reflection-absorption infrared spectroscopic study of alkyne adsorption on Cu (111). *Journal of electron spectroscopy and related phenomena* 1987, *44*, 99–108.
- (14) Steininger, H.; Ibach, H.; Lehwald, S. Surface reactions of ethylene and oxygen on Pt (111). *Surface Science* 1982, *117*, 685–698.
- (15) Studt, F.; Abild-Pedersen, F.; Bligaard, T.; Sørensen, R. Z.; Christensen, C. H.; Nørskov, J. K. Identification of non-precious metal alloy catalysts for selective hydrogenation of acetylene. *Science* 2008, *320*, 1320–1322.
- (16) Medlin, J. W.; Allendorf, M. D. Theoretical study of the adsorption of acetylene on the (111) surfaces of Pd, Pt, Ni, and Rh. *The Journal of Physical Chemistry B* 2003, *107*, 217–223.

- (17) Mittendorfer, F.; Thomazeau, C.; Raybaud, P.; Toulhoat, H. Adsorption of unsaturated hydrocarbons on Pd (111) and Pt (111): A DFT study. *The Journal of Physical Chemistry B* 2003, *107*, 12287–12295.
- (18) Xie, X.; Song, X.; Dong, W.; Liang, Z.; Fan, C.; Han, P. Adsorption Mechanism of Acetylene Hydrogenation. *Chinese Journal of Chemistry* 2014, *32*, 631–636.
- (19) Sheth, P. A.; Neurock, M.; Smith, C. M. A first-principles analysis of acetylene hydrogenation over Pd (111). *The Journal of Physical Chemistry B* 2003, *107*, 2009–2017.
- (20) Wong, Y.-T.; Hoffmann, R. A comparative study of the chemisorption of ethene on three metal surfaces: Ni (111), Pd (111) and Pt (111). *Journal of the Chemical Society, Faraday Transactions* 1990, *86*, 4083–4094.
- (21) Moskaleva, L. V.; Chen, Z.-X.; Aleksandrov, H. A.; Mohammed, A. B.; Sun, Q.; Rosch, N. Ethylene conversion to ethylidyne over Pd (111): revisiting the mechanism with first-principles calculations. *The Journal of Physical Chemistry C* 2009, *113*, 2512–2520.
- (22) Tao, J.; Perdew, J. P.; Staroverov, V. N.; Scuseria, G. E., Climbing the density functional ladder: nonempirical meta-generalized gradient approximation designed for molecules and solids. *Phys. Rev. Lett.* 2003, *91*, 146401.
- (23) Perdew, J. P.; Ruzsinszky, A.; Csonka, G. I.; Vydrov, O. A.; Scuseria, G. E.; Constantin, L. A.; Zhou, X.; Burke, K., Restoring the density-gradient expansion for exchange in solids and surfaces. *Phys. Rev. Lett.* 2008, *100*, 136406.
- (24) Tkatchenko, A.; Scheffler, M., Accurate molecular van der Waals interactions from ground-state electron density and free-atom reference data. *Phys. Rev. Lett.* 2009, *102*, 073005.
- (25) Kabalan, L.; Kowalec, I.; Catlow, C. R. A.; Logsdail, A. J., A computational study of the properties of low- and high-index Pd, Cu and Zn surfaces. *Phys. Chem. Chem. Phys.* 2021, *23*, 14649-14661.



- (26) Chase, M. W., Jr., NIST-JANAF Thermochemical Tables, Fourth Edition. *J. Phys. Chem. Ref. Data* 1998, 9, 1-1951
- (27) Grube, G.; Schneider, A.; Esch, U., *Heraeus Festschrift*, 1951, 20.
- (28) Togo, A.; Chaput, L.; Tanaka, I.; Hug, G., *Phys. Rev. B*, 2010, 81, 174301.
